# Supplementary material for: Divalent cations potentiate TRPV1 channel by lowering the heat activation threshold
Source: PubMed Central journal article supplement — J Gen Physiol. 2014 Jan;143(1):75–90. doi: 10.1085/jgp.201311025 (PMC3874569; doi:10.1085/jgp.201311025), 2014-01
Supplement: supp_jgp.201311025_JGP_201311025_sm.pdf [file supp_jgp.201311025_JGP_201311025_sm.pdf]

Cao et al., <http://www.jgp.org/cgi/content/full/jgp.201311025/DC1>

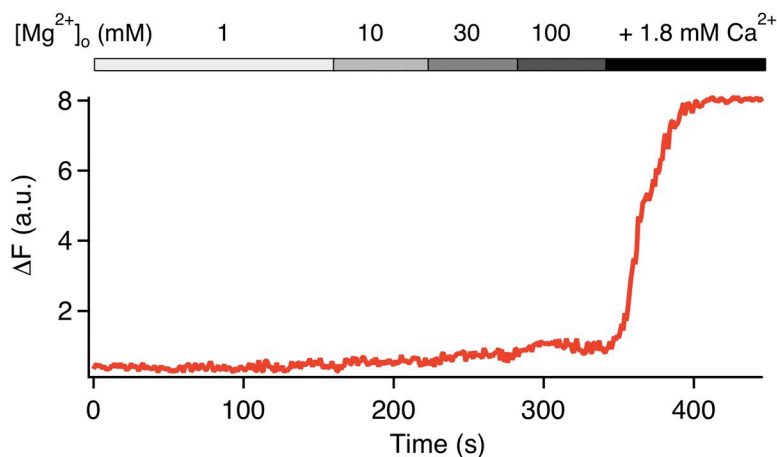

**Figure S1.** Fluorescence intensity increase upon channel opening was mainly induced by  $\text{Ca}^{2+}$ , while  $\text{Mg}^{2+}$  could also induce a small fluorescence signal. A TRPV1-expressing cell was loaded with Fluo-4; channel activation was induced by increasing concentration of  $\text{Mg}^{2+}$  in the absence of  $\text{Ca}^{2+}$ . At the end of the recording, the cell was exposed to a solution containing 100 mM  $\text{Mg}^{2+}$  supplemented with 1.8 mM  $\text{Ca}^{2+}$ . The large increase in fluorescence intensity indicates that the fluorescence increase observed in this study was predominantly from binding of  $\text{Ca}^{2+}$  instead of  $\text{Mg}^{2+}$  to Fluo-4.

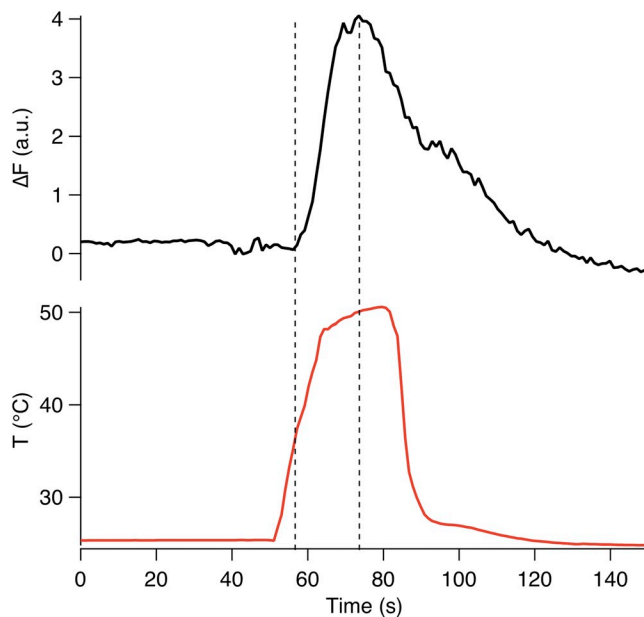

**Figure S2.** Representative time course of the temperature-dependent fluorescence intensity change (top) upon heating (bottom) in a TRPV1-expressing cell. Broken lines indicate the times when the activation threshold temperature (first) and the peak current (second) were reached. Decline of fluorescence intensity started while the temperature remained high.
